# Supplementary material
Source: publisher figshare collection journal article supplement (https://brill.figshare.com/ndownloader/files/16499000)
Supplement: Supplementary file 1 [file 16499000]

**Intra-genomic variability and pseudogenes in ribosomal  
ITS regions of *Paraplagusia blochii* (Pleuronectiformes:  
Cynoglossidae)**

**Li Gong<sup>1,2,\*</sup>, Xiaoyu Kong<sup>3,4,\*</sup>, Hairong Luo<sup>3,4</sup>, Shixi Chen<sup>3,4</sup>, Wei Shi<sup>3,4</sup> and Min  
Yang<sup>3,4</sup>**

<sup>1</sup> National Engineering Laboratory of Marine Germplasm Resources Exploration and Utilization,  
Zhejiang Ocean University, 316022, Zhoushan, China

<sup>2</sup> National Engineering Research Center for Facilitated Marine Aquaculture, Marine Science and  
Technology College, Zhejiang Ocean University, 316022, Zhoushan, China

<sup>3</sup> Key Laboratory of Tropical Marine Bio-Resources and Ecology, Guangdong Provincial Key  
Laboratory of Applied Marine Biology, South China Sea Institute of Oceanology, Chinese Academy of  
Sciences, Guangzhou 510000, China

<sup>4</sup> South China Sea Bio-Resource Exploitation and Utilization Collaborative Innovation Center,  
Guangzhou 510000, China

Submitted: January 31, 2019. Final revision received: July 15, 2019. Accepted: July 21, 2019

**Supplementary material**

---

\* Corresponding authors; e-mail: [xykong@scsio.ac.cn](mailto:xykong@scsio.ac.cn) (X. Kong); [gongli1027@163.com](mailto:gongli1027@163.com) (Li Gong)

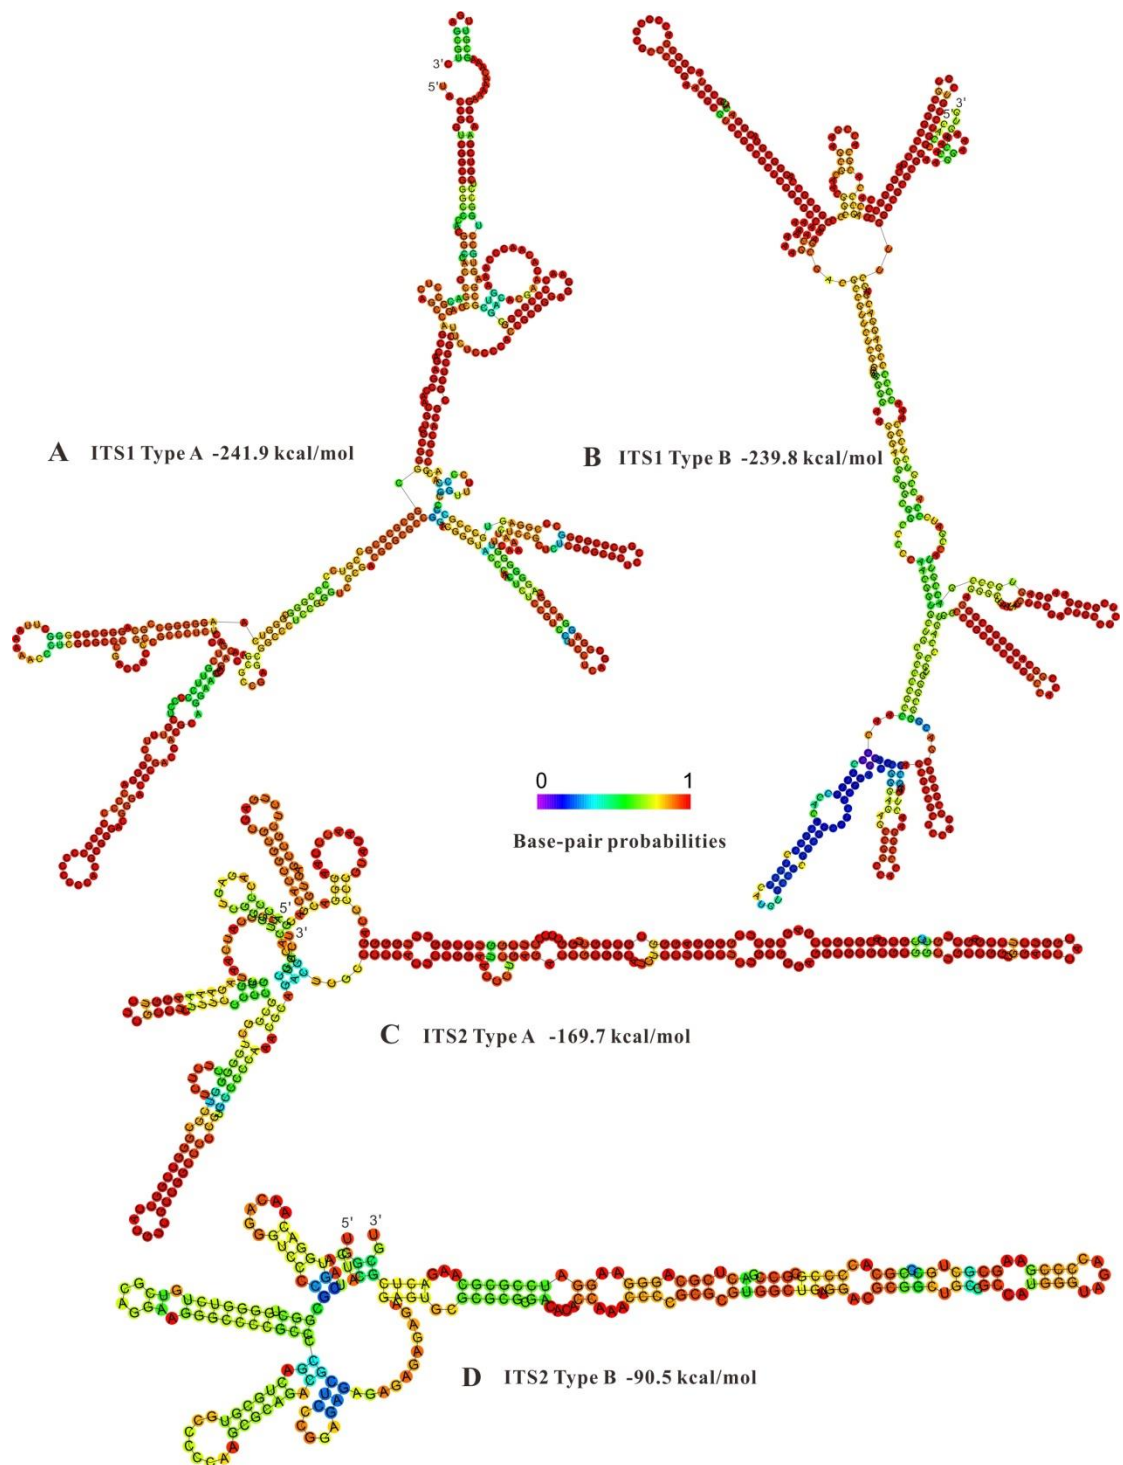

**Figure S1.** Inferred secondary structures of the two types of rDNA sequences of *Paraplagusia blochii*.
